# Supplementary material for: Increased photocorrosion resistance of ZnO foams via transition metal doping
Source: Royal Society of Chemistry journal article supplement (doi:10.1039/d2ra06730g), 2023-01-01
Supplement: d2ra06730g1.pdf [file d2ra06730g1.pdf]

1  
2  
3  
4  
5  
6  
7  
8  
9  
10  
11  
12  
13  
14  
15  
16  
17  
18  
19  
20  
21  
22  
23  
24  
25  
26  
27  
28  
29  
30

**Supplementary Information for**

**Increased Photocorrosion Resistance of ZnO foams Through Transition Metal Doping.**

Zachary Warren,<sup>a</sup> Jannis Wenk <sup>a</sup> and Davide Mattia\*<sup>a</sup>

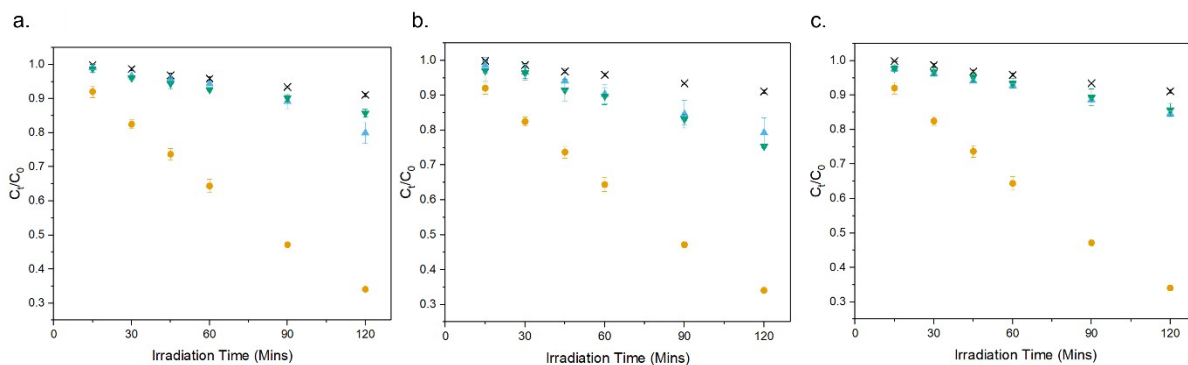

31

32 *Figure S1: Photocatalytic degradation of CBZ using ZnO doped with various concentrations of a) Co, b) Ni and c) Cu:*

33 *× photolysis, ● undoped, ◻ 1%, and ◼ 2%.*

34

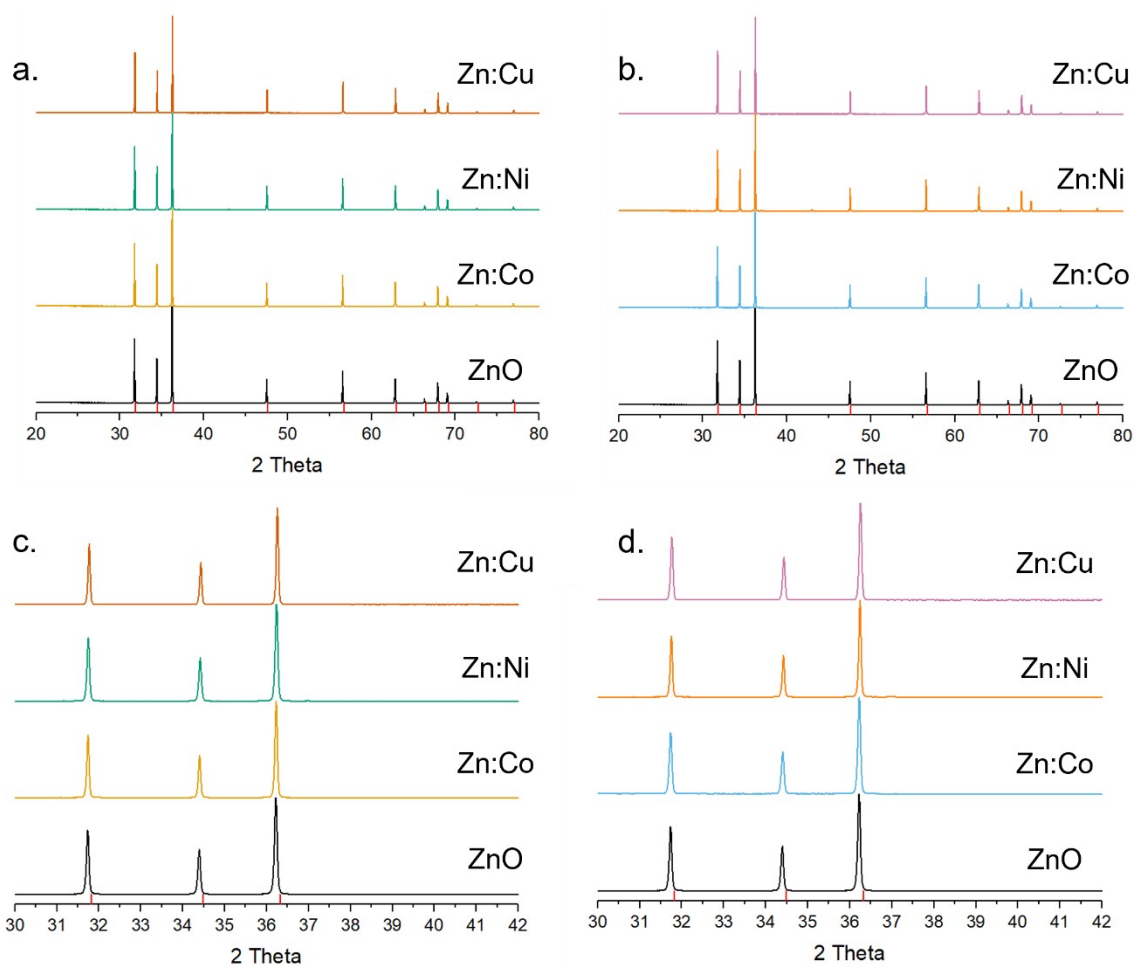

35

36 *Figure S2: XRD spectra of a,c) 1% and b,d) 2% transition metal doped ZnO molfoams. Tick marks correspond to peaks*  
 37 *reported from JCPDS No. 36-1451<sup>1</sup>*

38

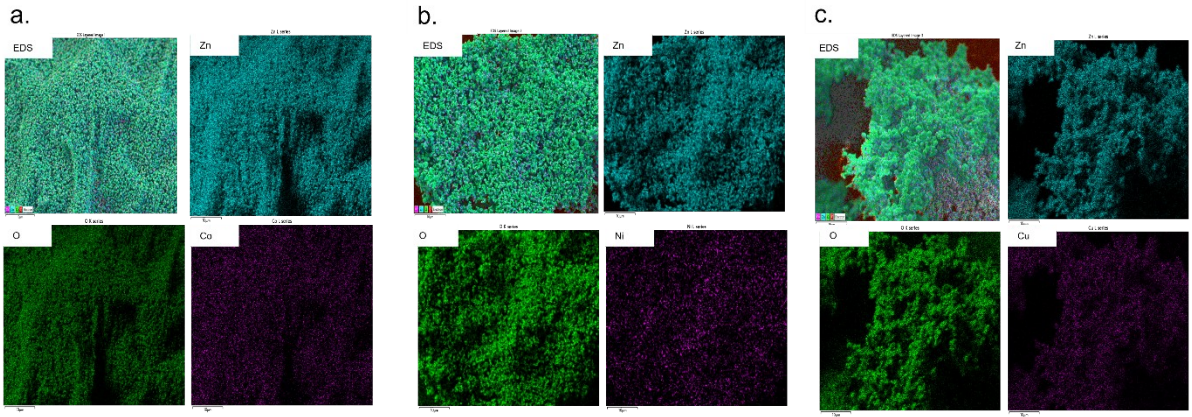

39

40 *Figure S3: EDX elemental mapping for ZnO doped with a) Co, b) Ni and c) Cu.*

41

42

43

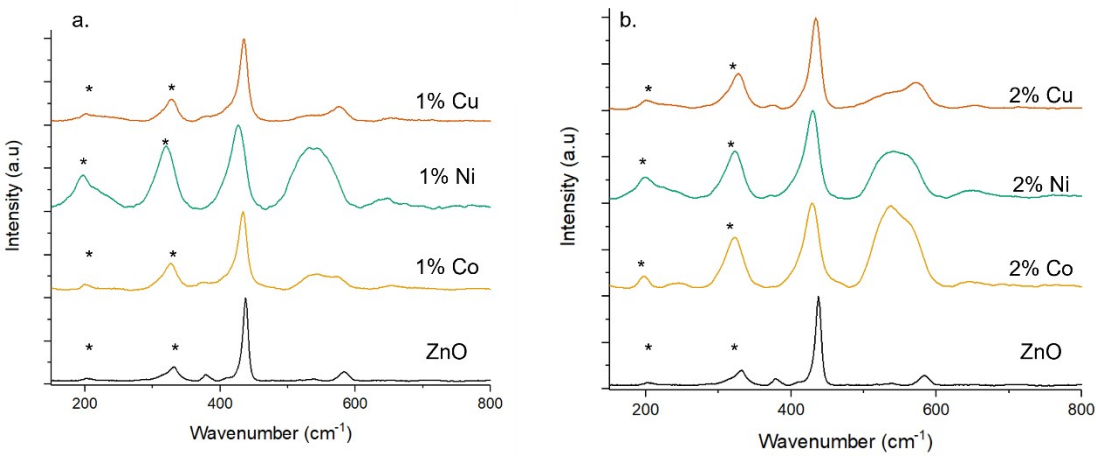

44

45 *Figure S4: Raman spectra of pure and doped ZnO molfoams at dopant concentrations of a) 1% and b) 2%. \* correspond to*  
 46 *multi-phonon features.*

47

48

49

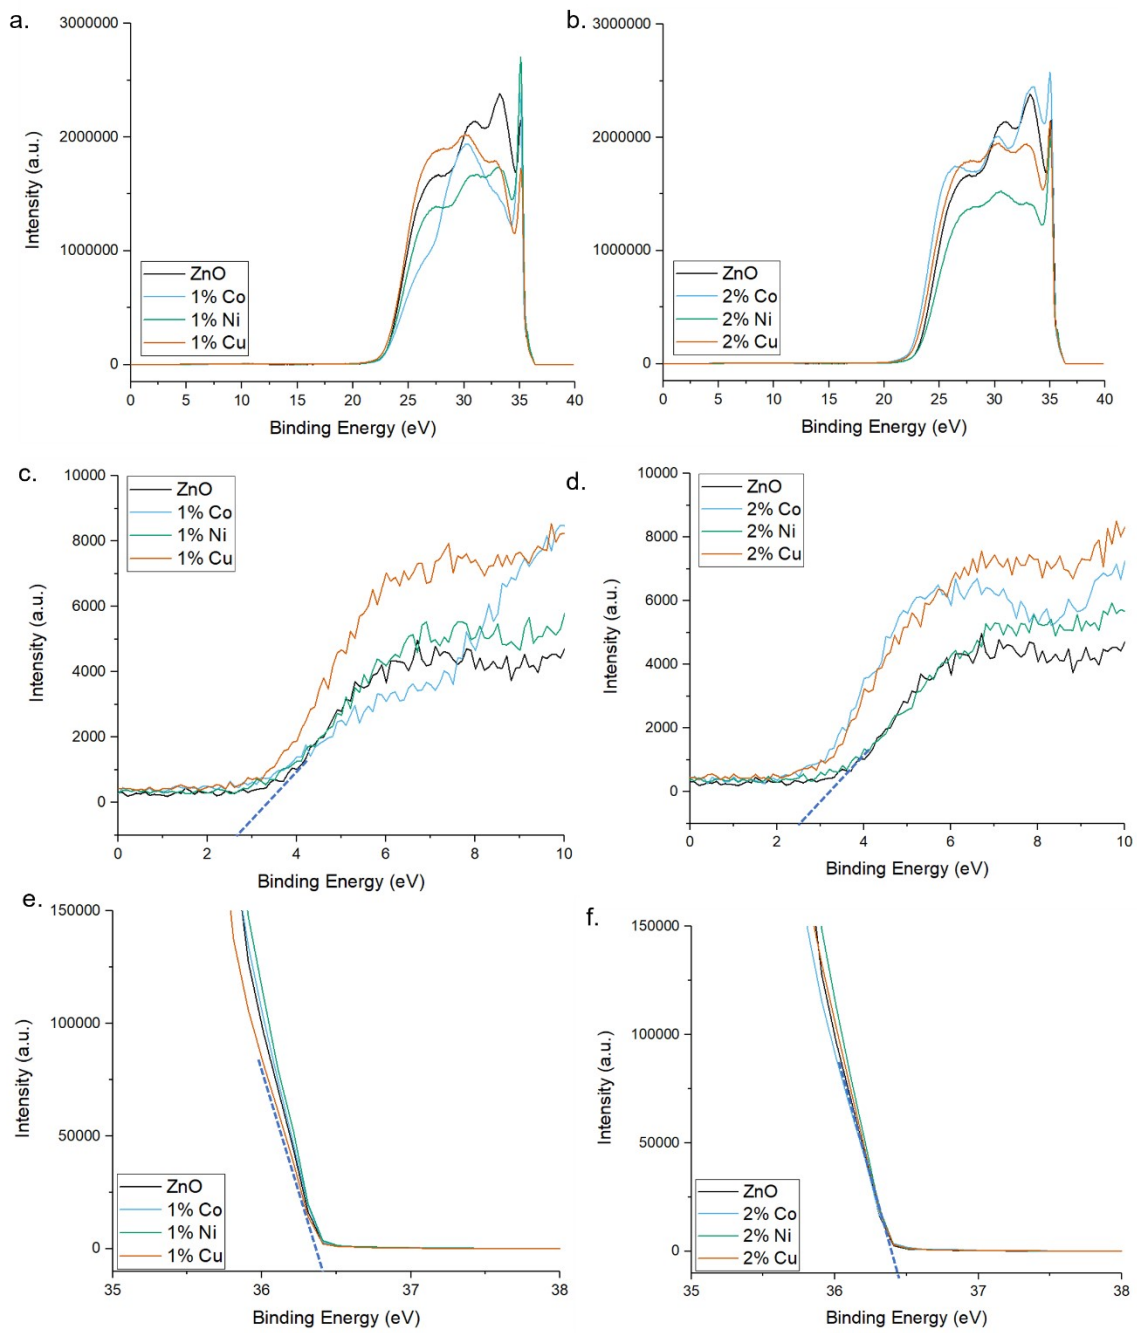

50

51 *Figure S5: UPS spectra of doped and pure ZnO showing a,b) full spectra, c,d) valance band region and e,f) cut off region.*

52

53

54

55

56

57

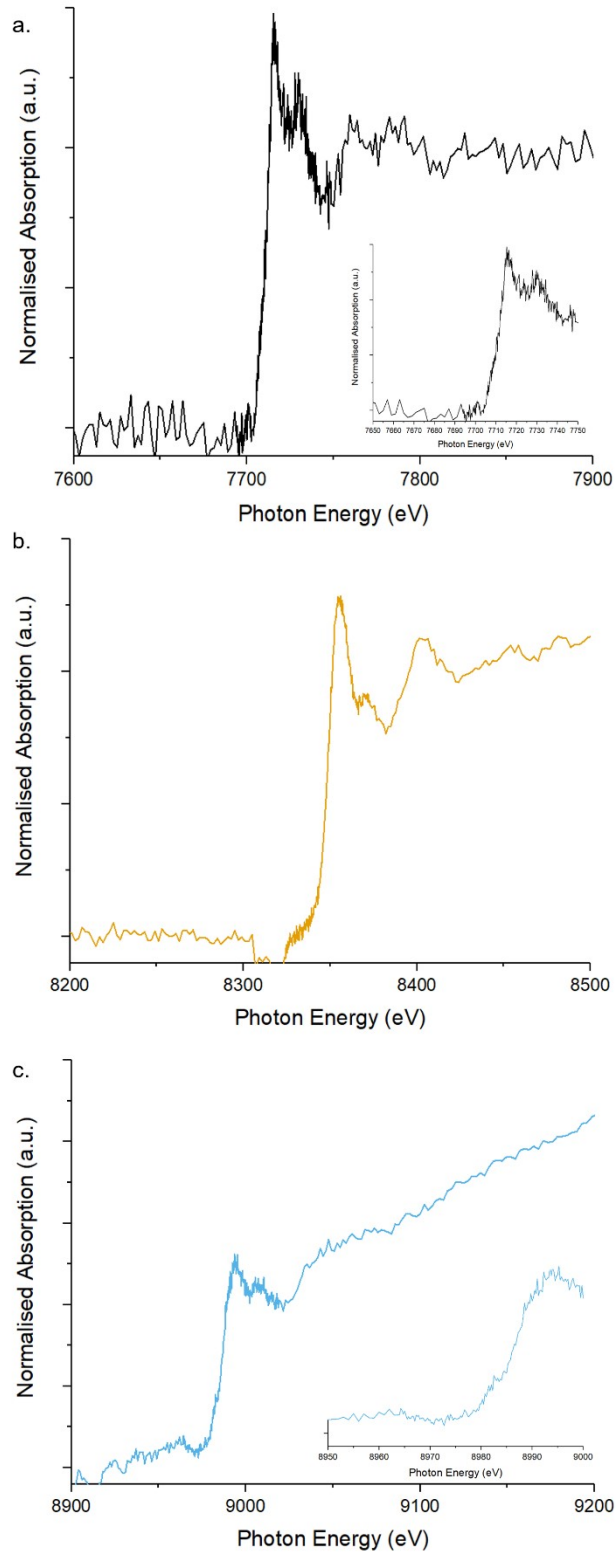

58

59 *Figure S6: Xanes spectra of a) Co, b) Ni and c) Cu within doped ZnO foams. The insets of a and c show clearer the pre-edge*  
 60 *features.*

61

62

63

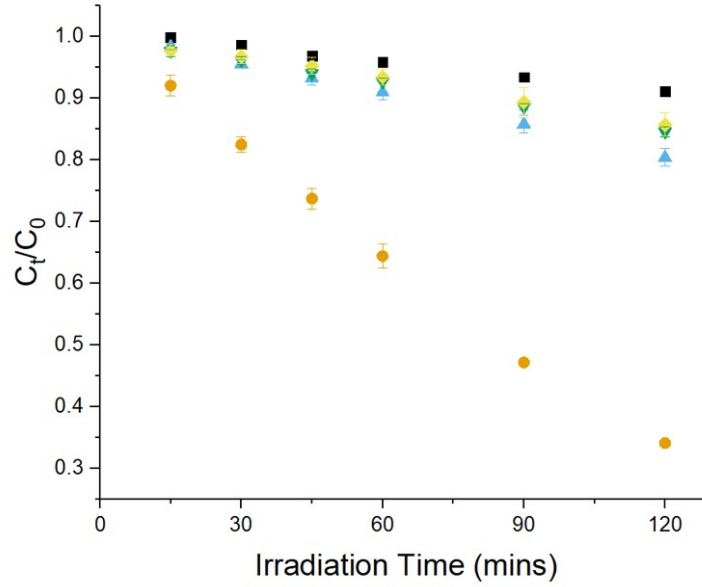

64

65 Figure S7: Photocatalytic degradation of CBZ using ZnO doped with various concentrations of Cu:

66 × photolysis, ● undoped, ◻ 0.5%, ◻ 1% and ◻ 2%.

67

### 68 Text S1. Quantum yield calculations

69 The quantum yield allows for an assessment of the photon efficiency, assessing the number  
 70 of pollutant molecules undergoing degradation relative to the number of photons reaching  
 71 the catalyst surface <sup>2</sup>. Based on the definitions contained in the IUPAC glossary, the  
 72 following equations are proposed to calculate the quantum yield of photocatalytic foams:

$$k' = (k)(C_0)(V_{Illuminated}) \text{ (mol s}^{-1}\text{)} \quad (1)$$

$$N_P = \frac{I_{\alpha\lambda} * S * t}{E_P} \text{ (-)} \quad (2)$$

$$q_{n,p} = \left(\frac{N_P}{t}\right) \frac{1}{N_A} \text{ (mol s}^{-1}\text{)} \quad (3)$$

$$\phi = \frac{k'}{q_{n,p}} \text{ (-)} \quad (4)$$

73

74 where,  $k'$  is the rate of pollutant degradation ( $\text{mol s}^{-1}$ ),  $k$  is the kinetic constant ( $\text{s}^{-1}$ ),  $C_0$  is the  
 75 initial pollutant concentration ( $\text{mol L}^{-1}$ ),  $V_{Illuminated}$  is the volume of pollutant irradiated.

76 The number of photons can be calculated using Equation 1, where  $I_{\alpha\lambda}$  is the attenuated  
77 irradiance of the light source accounting for absorbance of the medium and the pollutant  
78 molecule(s) ( $W\ m^{-2}$ ) [XX],  $S$  is the surface of the sample onto which the light impinges ( $m^2$ )  
79 and  $t$  is the time under irradiation.

80  $E_p = \frac{h * c}{\lambda}$  ( $J$ ) is the photon energy at the wavelength emitted by the lamps, where  $h$  is  
81 Planck's constant,  $c$  is the speed of light and  $\lambda$  is the wavelength of light ( $m$ ) from the lamps.  
82 The photon flux is the numbers of photons during irradiation of a mol of photons, where  $N_A$   
83 is Avogadro's number (equation 3) . Finally, the quantum yield ( $\phi$ ) is calculated using  
84 equation 4.

### 85 **Text S2. Photocatalytic reactor energy consumption calculations.**

86 To assess the viability of scaling up of the system, the energy consumption of the  
87 reactor was accounted for by using the electrical energy per order ( $E_{EO}$ ), defined as the  
88 kilowatt hours of electrical energy needed to decrease the concentration of a pollutant  
89 by an order of magnitude (90%) in one cubic metre of solution. <sup>3</sup>

$$90 \quad E_{EO} = \frac{P * t * I * 1,000}{V(\log \frac{C_0}{C_t})} \quad (5)$$

91 Where:  $P$  is the total power output of the 3 lamps onto the 12 cm long quartz tube (kW),  $t$  is  
92 the irradiation time (hrs)  $V$  is the volume of reservoir (L) and  $C_0$  and  $C_t$  are the initial and  
93 final concentrations of pollutants respectively. As the foam occupied only a fraction of the  
94 quartz tube, the total power of the lamps, which act on the whole quartz tube, was  
95 multiplied by the volumetric fraction occupied by the foam (i.e. foam volume/quartz tube  
96 volume), to provide the effective power used for photocatalysis, considering that the  
97 contribution of photolysis is negligible. This is rendered necessary by the recirculating  
98 nature of the reactor, unlike a simple batch reactor, where the entire reservoir would be  
99 irradiated. In the present work, the external diameter of the foam corresponds to the  
100 internal diameter of the tube, so that the volumetric fraction is equivalent to the ratio of the  
101 foam's length to the total length of the quartz tube: 2 cm/12 cm = 0.17. For the recirculating

102 MolFoam reactors, three 5 W lamps were used, giving a P value of  $15 \times 10^{-3}$  kW, irradiation  
103 time was 120 minutes, volume of solution was 0.5 L, and the volumetric fraction 0.17.

104 **Text S3. Calculations used in band edge diagram construction.**

105 In order to construct the band edge diagram, the energies of the valence and  
106 conduction bands had to be calculated using a combination of ultraviolet  
107 photoelectron spectroscopy (UPS) and UV-Vis spectroscopy.

108 The UPS measurements determined the work function (W) of the samples (Equation  
109 6)

$$110 \quad W \text{ (eV)} = 40.8 \text{ eV He(II)} - \text{cut off region intercept} \quad (6)$$

111 Where W is the work function of the material, 40.8 eV corresponds to the characteristic  
112 energy of He (II), and cut off region intercept is the extrapolation of where the higher energy  
113 portion of the spectra crosses the x axis as shown in Figure S2 c and f.

114 From this, the energy level of the valence band maximum can be calculated (Equation 7) using  
115 the work function of the sample and the x intercept of the valence band region in the low  
116 binding energy region of the spectra as shown in Figure S2 b and e.

$$117 \quad VB_{max} \text{ (eV)} = W + x \text{ intercept of valence band region} \quad (7)$$

$$118 \quad CB_{min} \text{ (eV)} = VB_{max} \text{ (eV)} - \text{Band Gap} \quad (8)$$

$$119 \quad E \text{ vs SHE (V)} = E \text{ vs vac. (eV)} - 4.5 \quad (9)$$

120 In order to compare energy values with the redox potentials of the  $\bullet\text{OH}/\text{H}_2\text{O}$  and  $\text{O}_2\bullet/\text{O}_2$   
121 couples, energies were converted to the scale of the Standard Hydrogen Electrode (SHE) by  
122 subtracting 4.5 V, (i.e. 0 V vs Vac = -4.5 V vs SHE) (Equation 9)

123

124

- 125 1. R. Boppella, K. Anjaneyulu, P. Basak and S. V. Manorama, *The Journal of Physical*  
126 *Chemistry C*, 2013, **117**, 4597-4605.  
127 2. N. Serpone and A. Salinaro, *Pure and Applied Chemistry*, 1999, **71**, 303-320.



128 3. J. R. Bolton, K. G. Bircher, W. Tumas and C. A. Tolman, *Pure and Applied Chemistry*,  
129 2001, **73**, 627-637.  
130
